# Supplementary material
Source: publisher site journal article supplement (https://www.spandidos-publications.com/7444/downloadSupplementary)
Supplement: Supplementary file 1 [file downloadSupplementary]

Table SI. Primer sequences for reverse transcription-quantitative PCR.

| Gene           | Forward, 5'-3'          | Reverse, 5'-3'           |
|----------------|-------------------------|--------------------------|
| <i>Cs</i>      | TTGGGAGCCAAGAACTCATC    | TCTGGCCTGCTCCTTAGGTA     |
| <i>Ogdh</i>    | CAGCTCGCTGTCTGAGTACG    | AATGATGCACTGTGCCATGT     |
| <i>Sucla2</i>  | TTGTGCATGGATGCAAAGAT    | CTGCTTCTTTGTCCCTTTCG     |
| <i>Glut4</i>   | GACGGACACTCCATCTGTTG    | CATAGCTCATGGCTGGAACC     |
| <i>Hk2</i>     | GAAGGGGCTAGGAGCTACCA    | CTCGGAGCACACGGAAGTT      |
| <i>Pk</i>      | CGATCTGTGGAGATGCTGAA    | AATGGGATCAGATGCAAAGC     |
| <i>Cd36</i>    | TGGCCTTACTTGGGATTGG     | CCAGTGTATATGTAGGCTCATCCA |
| <i>Cpt1b</i>   | GCACACCAGGCAGTAGCTTT    | CAGGAGTTGATTCCAGACAGGTA  |
| <i>Mcad</i>    | ACTGACGCCGTTTCAGATTTT   | GCTTAGTTACACGAGGGTGATG   |
| <i>LdhA</i>    | TGTCTCCAGCAAAGACTACTGT  | GACTGTACTTGACAATGTTGGGA  |
| <i>Mct1</i>    | GTGACCATTGTGGAATGCTG    | CTCCGCTTTCTGTTCTTTGG     |
| <i>Scot</i>    | TGGCCAACCTGGATGATACCTGG | TCCATGGTGACCACCCTTTGG    |
| <i>Glud1</i>   | CTATGGAGCTGGCCAAGAAG    | CCTATGGTGCTGGCATAGGT     |
| <i>Bcat2</i>   | TGGAGTGGAATAACAAGGCTG   | GTCTCCACCTTTGTATGCTTTC   |
| <i>Bckdha</i>  | CAGATGCCTGTTCACTACGG    | CCCTCGCCAAAGTAACAGATC    |
| <i>Atrg1</i>   | GCAGAGAGTCGGCAAGTC      | CAGGTCGGTGATCGTGAG       |
| <i>Murfl</i>   | CAACCTGTGCCGCAAGTG      | CAACCTCGTGCCTACAAGATG    |
| <i>β-actin</i> | CTAAGGCCAACCCTGAAAAG    | ACCAGAGGCATACAGGGACA     |

*Cs*, citrate synthase; *Ogdh*, oxoglutarate dehydrogenase; *Sucla2*, succinate-CoA ligase, subunit β; *Glut4*; glucose transporter 4; *Hk2*, hexokinase 2; *Pk*, pyruvate kinase; *Cd36*, cluster of differentiation 36; *Cpt1b*, carnitine palmitoyl transferase 1-b; *Mcad*, medium-chain acyl-CoA dehydrogenase; *LdhA*, lactate dehydrogenase A; *Mct1*, monocarboxylic acid transporter 1; *Scot*, succinyl CoA 3-oxoacid CoA transferase; *Glud1*, glutamate dehydrogenase 1; *Bcat2*, branched-chain amino transaminase 2; *Bckdha*, branched chain α-keto acid dehydrogenase E1 α; *Atrg1*, atrogen-1; *Murfl*, muscle ring finger 1.
